# Supplementary material for: Grf10 and Bas1 Regulate Transcription of Adenylate and One-Carbon Biosynthesis Genes and Affect Virulence in the Human Fungal Pathogen Candida albicans
Source: PubMed Central journal article supplement (PMC5541157; doi:10.1128/msphere.00161-17), 2017-08-02

**A.**

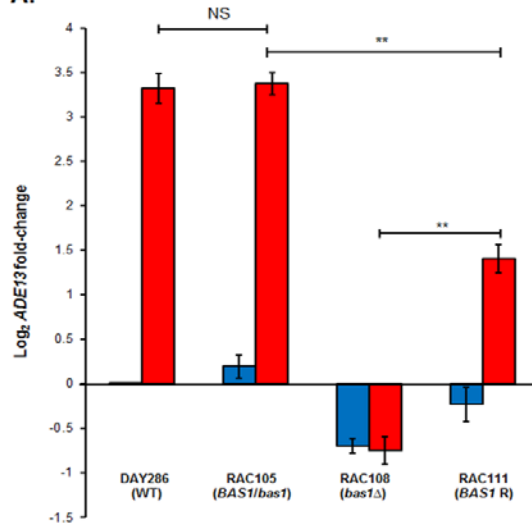

**B.**

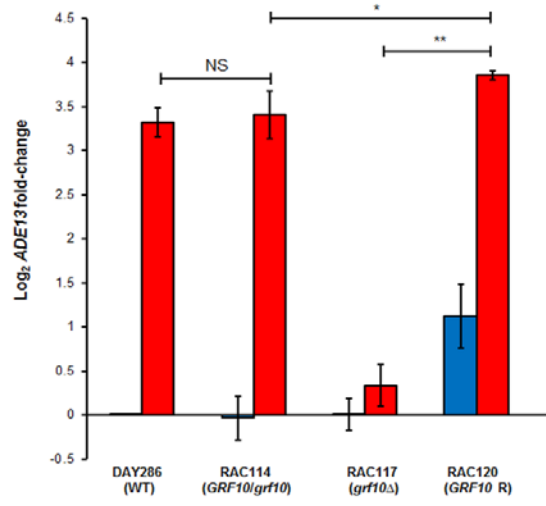

Supplement: sph004172329sf4.pdf [file sph004172329sf4.pdf]
